# Supplementary material for: Barium hydride activates Ni for ammonia synthesis catalysis
Source: Royal Society of Chemistry journal article supplement (doi:10.1039/d2fd00143h), 2022-11-30
Supplement: d2fd00143h1.pdf [file d2fd00143h1.pdf]

## Supplementary Information

### Barium hydride activates Ni for ammonia synthesis catalysis

Wenbo Gao,<sup>\*a,b</sup> Qianru Wang,<sup>a,b</sup> Yeqin Guan,<sup>a,b</sup> Hanxue Yan,<sup>a,b</sup> Jianping Guo<sup>\*a,b</sup> and Ping Chen<sup>a,b</sup>

<sup>a</sup>Dalian Institute of Chemical Physics, Chinese Academy of Sciences, Dalian 116023, China.

<sup>b</sup>University of Chinese Academy of Sciences, Beijing 100049, China.

Email: gaowenbo@dicp.ac.cn, guojianping@dicp.ac.cn.

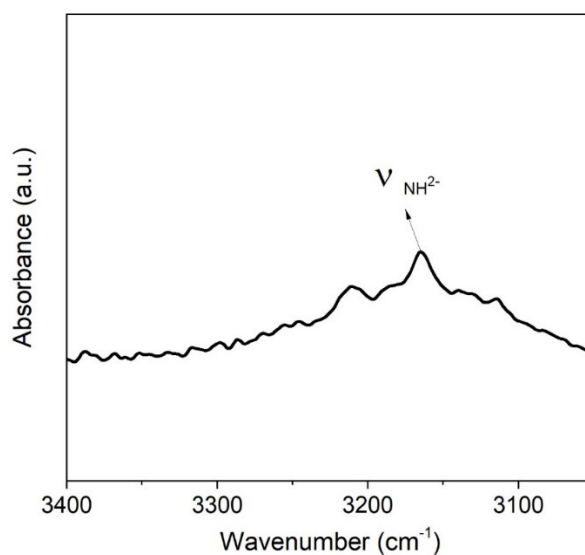

**Figure S1.** FTIR spectrum of the spent BaH<sub>2</sub>/Ni-Mg-O catalyst.

**Table S1.** Properties of the BaH<sub>2</sub>/Ni-Mg-O and Ni-Mg-O samples.

| Catalysts                 | Ni loading (wt %) | Ba loading (wt %) | Specific surface area (m <sup>2</sup> g <sup>-1</sup> ) |
|---------------------------|-------------------|-------------------|---------------------------------------------------------|
| BaH <sub>2</sub> /Ni-Mg-O | 20.5              | 60.7              | 45.3                                                    |
| Ni-Mg-O                   | 27.7              | 0                 | 251.5                                                   |
